# Supplementary material
Source: publisher site journal article supplement (https://www.spandidos-publications.com/2247/downloadSupplementary)

Figure S1. Knockdown efficiency of eIF5A2 siRNAs. Knockdown efficiency of three eIF5A2 siRNAs in hepatocellular carcinoma cells was assessed by western blotting. eIF5A2, eukaryotic translation initiation factor 5A2; si, small interfering.

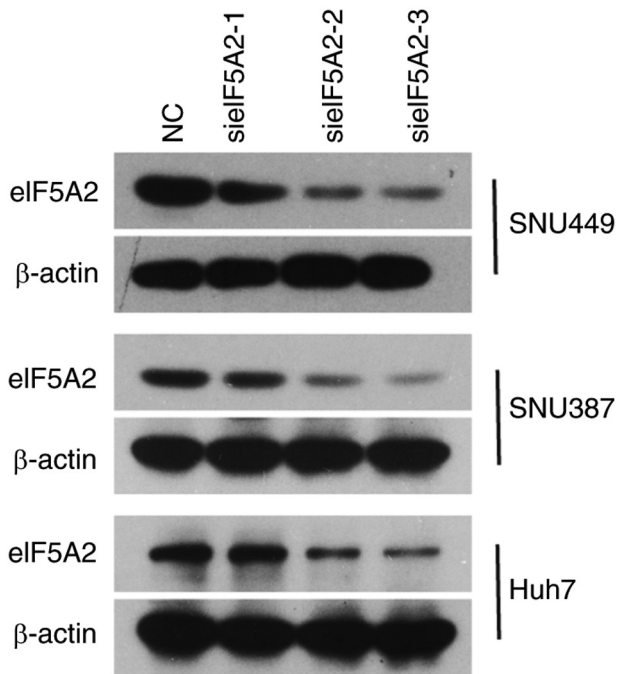

Figure S2. eIF5A2 is upregulated in HCC tissues. (A) Expression of eIF5A2 mRNA in the tumor and adjacent tissue was assessed by reverse transcription-quantitative PCR. (B) Expression of eIF5A2 protein in the tumor and adjacent tissue was assessed by western blotting. eIF5A2, eukaryotic translation initiation factor 5A2; HCC, hepatocellular carcinoma.

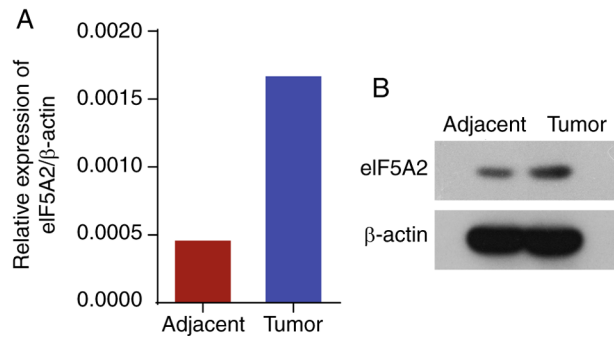

Supplement: Supplementary file 1 [file downloadSupplementary]
